# Supplementary material for: Persistence of a Core Microbiome Through the Ontogeny of a Multi-Host Parasite
Source: Front Microbiol. 2020 May 19;11:954. doi: 10.3389/fmicb.2020.00954 (PMC7248275; doi:10.3389/fmicb.2020.00954)
Supplement: Supplementary file 2 [file Data_Sheet_2.xlsx]

## Sheet: Contents
Supplementary tables
Table S1. Metadata
Table S2. Venn diagram intersection list of the family level taxa among the four life stages
Table S3. Venn diagram intersection list of the family level taxa among the four life stages, host and environmental and external samples
Table S4. Kruskal-Wallis pairwise estimates for alpha diversity for the four life stages.
Table S5. Permutational ANOVA pairwise estimates for the four parasite life stages
Table S6. Kruskal-Wallis pairwise estimates for alpha diversity for the four parasite life stages, respective host and environmental samples
Table S7. Permutational ANOVA pairwise estimates over the reduced dataset for the four parasite life stages, respective host and environmental samples
Table S8. Quality assessment of mock communities

## Sheet: Table S1
Table S1. Metadata
SampleID	Barcodei7indexID	BarcodeSequence	sampleType	LifeStage	HostID	SampleLabID
CJNB8-3930P6-01-20-01	515rcbc0	AGCCTTCGTCGC	FPBS	FiPBS	G7	G7HPBS
CJNB8-3930P6-03-20-01	515rcbc2	AGCCCTGCTACA	parasite	metacercaria	A11	A11N2
CJNB8-3930P6-04-20-01	515rcbc3	CCTAACGGTCCA	LabEnv	SLabEnv	P8i	P8iW
CJNB8-3930P6-05-20-01	515rcbc4	CGCGCCTTAAAC	environment	environment	na	Wsubst2
CJNB8-3930P6-06-20-01	515rcbc5	TATGGTACCCAG	LabEnv	ALabEnv	A11	A11Lwater2
CJNB8-3930P6-08-20-01	515rcbc7	AATTTAGGTAGG	amphipod	i-amphipod	A12	A12H
CJNB8-3930P6-09-20-01	515rcbc8	GACTCAACCAGT	fish	i-fish	G5	G5H
CJNB8-3930P6-10-20-01	515rcbc9	GCCTCTACGTCG	blank	PBS-fishIsolation	NA	GPBS
CJNB8-3930P6-11-20-01	515rcbc10	ACTACTGAGGAT	snail	i-snail	P6i	P6iH
CJNB8-3930P6-12-20-01	515rcbc11	AATTCACCTCCT	SPBS	SiPBS	P3i	P3iHPBS
CJNB8-3930P6-15-20-01	515rcbc14	ACTCGCTCGCTG	parasite	metacercaria	A11	A11P
CJNB8-3930P6-16-20-01	515rcbc15	TTCCTTAGTAGT	PPBS	adPBS	G3	G3P2PBS
CJNB8-3930P6-17-20-01	515rcbc16	CGTCCGTATGAA	parasite	sporocyst	P4i	P4iP1
CJNB8-3930P6-19-20-01	515rcbc18	GGTTGCCCTGTA	parasite	metacercaria	A15	A15N
CJNB8-3930P6-20-20-01	515rcbc19	CATATAGCCCGA	parasite	metacercaria	A8	A12N1
CJNB8-3930P6-21-20-01	515rcbc20	GCCTATGAGATC	environment	environment	na	Wwater2
CJNB8-3930P6-22-20-01	515rcbc21	CAAGTGAAGGGA	parasite	sporocyst	P7i	P7iP2
CJNB8-3930P6-23-20-01	515rcbc22	CACGTTTATTCC	blank	PBS-snailIsolation	PBS	PPBS
CJNB8-3930P6-24-20-01	515rcbc23	TAATCGGTGCCA	parasite	sporocyst	P4i	P4iP2
CJNB8-3930P6-25-20-01	515rcbc24	TGACTAATGGCC	snail	i-snail	P3i	P3iH
CJNB8-3930P6-27-20-01	515rcbc26	CTGTCTATACTA	parasite	cercaria	P3i	P3iC1
CJNB8-3930P6-28-20-01	515rcbc27	TATGCCAGAGAT	LabEnv	FlabEnv	na	GlabWater1
CJNB8-3930P6-29-20-01	515rcbc28	CGTTTGGAATGA	parasite	sporocyst	P5i	P5iP2
CJNB8-3930P6-30-20-01	515rcbc29	AAGAACTCATGA	parasite	metacercaria	A8	A12P
CJNB8-3930P6-31-20-01	515rcbc30	TGATATCGTCTT	PPBS	sporPBS	P8i	P8iP2PBS
CJNB8-3930P6-32-20-01	515rcbc31	CGGTGACCTACT	APBS	AiPBS	A11	A11HPBS
CJNB8-3930P6-33-20-01	515rcbc32	AATGCGCGTATA	environment	environment	na	Wsubst1
CJNB8-3930P6-34-20-01	515rcbc33	CTTGATTCTTGA	blank	kit	na	BlankK
CJNB8-3930P6-35-20-01	515rcbc34	GAAATCTTGAAG	parasite	metacercaria	A14	A14N
CJNB8-3930P6-36-20-01	515rcbc35	GAGATACAGTTC	parasite	adult	G10	G10P1
CJNB8-3930P6-37-20-01	515rcbc36	GTGGAGTCTCAT	parasite	sporocyst	P2i	P2iP2
CJNB8-3930P6-38-20-01	515rcbc37	ACCTTACACCTT	parasite	cercaria	P8i	P8iC1
CJNB8-3930P6-41-20-01	515rcbc40	ACGCTTAACGAC	parasite	adult	G10	G10P2
CJNB8-3930P6-42-20-01	515rcbc41	TACGGATTATGG	parasite	adult	G3	G3P2
CJNB8-3930P6-43-20-01	515rcbc42	ATACATGCAAGA	PPBS	sporPBS	P5i	P5iP1PBS
CJNB8-3930P6-44-20-01	515rcbc43	CTTAGTGCAGAA	fish	i-fish	G7	G7H
CJNB8-3930P6-45-20-01	515rcbc44	AATCTTGCGCCG	MSC	MSC	MSC	MSC
CJNB8-3930P6-46-20-01	515rcbc45	AGGATCAGGGAA	amphipod	i-amphipod	A13	A13H
CJNB8-3930P6-47-20-01	515rcbc46	AATAACTAGGGT	snail	i-snail	P8i	P8iH
CJNB8-3930P6-48-20-01	515rcbc47	TATTGCAGCAGC	parasite	sporocyst	P7i	P7iP1
CJNB8-3930P6-50-20-01	515rcbc49	GTAGTAGACCAT	fish	i-fish	G3	G3H
CJNB8-3930P6-51-20-01	515rcbc50	AGTAAAGATCGT	blank	swabC1	na	Wcontrol1
CJNB8-3930P6-52-20-01	515rcbc51	CTCGCCCTCGCC	parasite	adult	G5	G5P1
CJNB8-3930P6-53-20-01	515rcbc52	TCTCTTTCGACA	parasite	adult	G3	G3P1
CJNB8-3930P6-55-20-01	515rcbc54	GTTGATACGATG	parasite	sporocyst	P8i	P8iP1
CJNB8-3930P6-56-20-01	515rcbc55	GTCAACGCTGTC	parasite	sporocyst	P8i	P8iP2
CJNB8-3930P6-57-20-01	515rcbc56	TGAGACCCTACA	LabEnv	FlabEnv	na	GlabWater2
CJNB8-3930P6-58-20-01	515rcbc57	ACTTGGTGTAAG	PPBS	mPBS	A11	A11NPBS
CJNB8-3930P6-60-20-01	515rcbc59	CACGCAGTCTAC	environment	environment	na	Wwater1
CJNB8-3930P6-62-20-01	515rcbc61	CCGGACAAGAAG	MSC	MSC1/2	MSC	MSC1/2
CJNB8-3930P6-63-20-01	515rcbc62	TTGCTGGACGCT	amphipod	i-amphipod	A11	A11H
CJNB8-3930P6-64-20-01	515rcbc63	TACTAACGCGGT	parasite	cercaria	P6i	P6iC2
CJNB8-3930P6-65-20-01	515rcbc64	GCGATCACACCT	parasite	sporocyst	P3i	P3iP1
CJNB8-3930P6-66-20-01	515rcbc65	CAAACGCACTAA	snail	i-snail	P5i	P5iH
CJNB8-3930P6-67-20-01	515rcbc66	GAAGAGGGTTGA	parasite	metacercaria	A8	A12N2
CJNB8-3930P6-68-20-01	515rcbc67	TGAGTGGTCTGT	fish	i-fish	G10	G10H
CJNB8-3930P6-69-20-01	515rcbc68	TTACACAAAGGC	blank	swabC2	na	Wcontrol2
CJNB8-3930P6-70-20-01	515rcbc69	ACGACGCATTTG	parasite	sporocyst	P1i	P1iP2
CJNB8-3930P6-71-20-01	515rcbc70	TATCCAAGCGCA	amphipod	i-amphipod	A16	A16H
CJNB8-3930P6-72-20-01	515rcbc71	AGAGCCAAGAGC	parasite	cercaria	P3i	P3iC2
CJNB8-3930P6-74-20-01	515rcbc73	TAAATATACCCT	amphipod	i-amphipod	A15	A15H
CJNB8-3930P6-75-20-01	515rcbc74	TTGCGGACCCTA	parasite	adult	G9	G9P1
CJNB8-3930P6-79-20-01	515rcbc78	GGTTCATGAACA	parasite	cercaria	P6i	P6iC1
CJNB8-3930P6-80-20-01	515rcbc79	TAACAATAATTC	PPBS	mPBS	A13	A13PPBS
CJNB8-3930P6-81-20-01	515rcbc80	CTTATTAAACGT	PPBS	mPBS	A14	A14NPBS
CJNB8-3930P6-82-20-01	515rcbc81	GCTCGAAGATTC	parasite	sporocyst	P5i	P5iP1
CJNB8-3930P6-87-20-01	515rcbc86	CGGTATAGCAAT	parasite	adult	G7	G7P2
CJNB8-3930P6-88-20-01	515rcbc87	GACTCTGCTCAG	parasite	sporocyst	P6i	P6iP2
CJNB8-3930P6-89-20-01	515rcbc88	GTCATGCTCCAG	PPBS	adPBS	G9	G9P1PBS
CJNB8-3930P6-90-20-01	515rcbc89	TACCGAAGGTAT	parasite	cercaria	P8i	P8iC2
CJNB8-3930P6-92-20-01	515rcbc91	AATGGTTCAGCA	LabEnv	ALabEnv	A8	A8Lwater1b
CJNB8-3930P6-93-20-01	515rcbc92	GAACCAGTACTC	parasite	metacercaria	A16	A16N
CJNB8-3930P6-94-20-01	515rcbc93	CGCACCCATACA	MSC	MSC	MSC	MSCDNA
CJNB8-3930P6-95-20-01	515rcbc94	GTGCCATAATCG	fish	i-fish	G9	G9H
CJNB8-3930P6-96-20-01	515rcbc95	ACTCTTACTTAG	parasite	metacercaria	A13	A13P
CJNB8-3930P6-97-20-01	515rcbc96	CTACAGGGTCTC	parasite	adult	G9	G9P3
CJNB8-3930P6-98-20-01	515rcbc97	CTTGGAGGCTTA	parasite	adult	G7	G7P1
CJNB8-3930P6-99-20-01	515rcbc98	TATCATATTACG	parasite	adult	G9	G9P2
CJNB8-3930P6-100-20-01	515rcbc99	CTATATTATCCG	APBS	AiPBS	A13	A13HPBS
CJNB8-3930P6-101-20-01	515rcbc100	ACCGAACAATCC	parasite	metacercaria	A11	A11N1
CJNB8-3930P6-102-20-01	515rcbc101	ACGGTACCCTAC	snail	i-snail	P2i	P2iH
CJNB8-3930P6-103-20-01	515rcbc102	TGAGTCATTGAG	LabEnv	SLabEnv	P7	P7W
CJNB8-3930P6-104-20-01	515rcbc103	ACCTACTTGTCT	parasite	sporocyst	P6i	P6iP1
CJNB8-3930P6-105-20-01	515rcbc104	ACTGTGACGTCC	parasite	sporocyst	P3i	P3iP2
CJNB8-3930P6-106-20-01	515rcbc105	CTCTGAGGTAAC	parasite	sporocyst	P2i	P2iP1
CJNB8-3930P6-107-20-01	515rcbc106	CATGTCTTCCAT	parasite	sporocyst	P1i	P1iP1
CJNB8-3930P6-108-20-01	515rcbc107	AACAGTAAACAA	blank	PBS-ampIsolation	na	APBS
CJNB8-3930P6-109-20-01	515rcbc108	GTTCATTAAACT	amphipod	i-amphipod	A14	A14H
CJNB8-3930P6-110-20-01	515rcbc109	GTGCCGGCCGAC	parasite	metacercaria	A8	A12N3
CJNB8-3930P6-111-20-01	515rcbc110	CCTTGACCGATG	parasite	metacercaria	A11	A11N3
CJNB8-3930P6-112-20-01	515rcbc111	CAAACTGCGTTG	blank	PCR	na	PCR

## Sheet: Table S2
Table S2. Venn diagram intersection list of the family level taxa among the four life stages
Names	total	elements
adult-5 cercaria-5 metacercaria-5 sporocyst-5	11	k__Bacteria;p__Proteobacteria;c__Gammaproteobacteria;o__Xanthomonadales;f__Xanthomonadaceae
		k__Bacteria;p__Proteobacteria;c__Betaproteobacteria;o__Burkholderiales;f__Oxalobacteraceae
		k__Bacteria;p__Actinobacteria;c__Actinobacteria;o__Actinomycetales;f__Propionibacteriaceae
		k__Bacteria;p__Proteobacteria;c__Gammaproteobacteria;o__Pseudomonadales;f__Moraxellaceae
		k__Bacteria;p__Proteobacteria;c__Alphaproteobacteria;o__Caulobacterales;f__Caulobacteraceae
		k__Bacteria;p__Firmicutes;c__Bacilli;o__Bacillales;f__Bacillaceae
		k__Bacteria;p__Bacteroidetes;c__Flavobacteriia;o__Flavobacteriales;f__Flavobacteriaceae
		k__Bacteria;p__Firmicutes;c__Bacilli;o__Lactobacillales;f__Streptococcaceae
		k__Bacteria;p__Proteobacteria;c__Betaproteobacteria;o__Burkholderiales;f__Comamonadaceae
		k__Bacteria;p__Proteobacteria;c__Alphaproteobacteria;o__Sphingomonadales;f__Sphingomonadaceae
		k__Bacteria;p__Actinobacteria;c__Actinobacteria;o__Actinomycetales;f__Corynebacteriaceae
cercaria-5 metacercaria-5 sporocyst-5	1	k__Bacteria;p__Actinobacteria;c__Actinobacteria;o__Actinomycetales;f__Microbacteriaceae
adult-5 cercaria-5 sporocyst-5	1	k__Bacteria;p__Bacteroidetes;c__[Saprospirae];o__[Saprospirales];f__Chitinophagaceae
adult-5 metacercaria-5 sporocyst-5	7	k__Bacteria;p__Proteobacteria;c__Alphaproteobacteria;o__Rhizobiales;f__Methylobacteriaceae
		k__Bacteria;p__Proteobacteria;c__Alphaproteobacteria;o__Rhodobacterales;f__Rhodobacteraceae
		k__Bacteria;p__Actinobacteria;c__Actinobacteria;o__Actinomycetales;f__Micrococcaceae
		k__Bacteria;p__Bacteroidetes;c__Bacteroidia;o__Bacteroidales;f__Prevotellaceae
		k__Bacteria;p__Proteobacteria;c__Betaproteobacteria;o__Neisseriales;f__Neisseriaceae
		k__Bacteria;p__Proteobacteria;c__Alphaproteobacteria;o__Rhizobiales;f__Bradyrhizobiaceae
		k__Bacteria;p__[Thermi];c__Deinococci;o__Thermales;f__Thermaceae
adult-5 cercaria-5 metacercaria-5	2	k__Bacteria;p__Bacteroidetes;c__Cytophagia;o__Cytophagales;f__Cytophagaceae
		k__Bacteria;p__Proteobacteria;c__Gammaproteobacteria;o__Pseudomonadales;f__Pseudomonadaceae
cercaria-5 sporocyst-5	3	k__Bacteria;p__Proteobacteria;c__Alphaproteobacteria;o__Rhizobiales;f__Phyllobacteriaceae
		k__Bacteria;p__Verrucomicrobia;c__Verrucomicrobiae;o__Verrucomicrobiales;f__Verrucomicrobiaceae
		k__Bacteria;p__Proteobacteria;c__Deltaproteobacteria;o__Myxococcales;f__
metacercaria-5 sporocyst-5	6	k__Bacteria;p__Actinobacteria;c__Actinobacteria;o__Actinomycetales;f__Geodermatophilaceae
		k__Bacteria;p__Firmicutes;c__Clostridia;o__Clostridiales;f__Peptostreptococcaceae
		k__Bacteria;p__Actinobacteria;c__Actinobacteria;o__Actinomycetales;f__Mycobacteriaceae
		k__Bacteria;p__Firmicutes;c__Clostridia;o__Clostridiales;f__Clostridiaceae
		k__Bacteria;p__Bacteroidetes;c__Flavobacteriia;o__Flavobacteriales;f__[Weeksellaceae]
		k__Bacteria;p__Proteobacteria;c__Alphaproteobacteria;o__Rhizobiales;f__Hyphomicrobiaceae
adult-5 sporocyst-5	4	k__Bacteria;p__Proteobacteria;c__Alphaproteobacteria;o__Rhizobiales;f__Rhizobiaceae
		k__Bacteria;p__Cyanobacteria;c__Oscillatoriophycideae;o__Chroococcales;f__Xenococcaceae
		k__Bacteria;p__Firmicutes;c__Bacilli;o__Lactobacillales;f__Enterococcaceae
		k__Bacteria;p__Firmicutes;c__Bacilli;o__Bacillales;f__Staphylococcaceae
cercaria-5 metacercaria-5	1	k__Bacteria;p__Actinobacteria;c__Acidimicrobiia;o__Acidimicrobiales;f__
adult-5 cercaria-5	1	k__Bacteria;p__Proteobacteria;c__Deltaproteobacteria;o__Bdellovibrionales;f__Bdellovibrionaceae
adult-5 metacercaria-5	3	k__Bacteria;p__Bacteroidetes;c__Sphingobacteriia;o__Sphingobacteriales;f__Sphingobacteriaceae
		k__Bacteria;p__Proteobacteria;c__Gammaproteobacteria;o__Pasteurellales;f__Pasteurellaceae
		k__Bacteria;p__Firmicutes;c__Bacilli;o__Lactobacillales;__
sporocyst-5	22	k__Bacteria;p__Proteobacteria;c__Epsilonproteobacteria;o__Campylobacterales;f__Campylobacteraceae
		k__Bacteria;p__Proteobacteria;c__Betaproteobacteria;o__Burkholderiales;f__Alcaligenaceae
		k__Bacteria;p__Actinobacteria;c__Thermoleophilia;o__Solirubrobacterales;f__Patulibacteraceae
		k__Bacteria;p__Gemmatimonadetes;c__Gemm-3;o__;f__
		k__Bacteria;p__Actinobacteria;c__Actinobacteria;o__Actinomycetales;f__Cellulomonadaceae
		k__Bacteria;p__Chloroflexi;c__Thermomicrobia;o__JG30-KF-CM45;f__
		k__Bacteria;p__Proteobacteria;c__Gammaproteobacteria;o__Enterobacteriales;f__Enterobacteriaceae
		k__Bacteria;p__Actinobacteria;c__Actinobacteria;o__Actinomycetales;f__Brevibacteriaceae
		k__Bacteria;p__Actinobacteria;c__Actinobacteria;o__Actinomycetales;f__Nocardioidaceae
		k__Bacteria;p__Actinobacteria;c__Actinobacteria;o__Actinomycetales;f__Ruaniaceae
		k__Bacteria;p__Proteobacteria;c__Betaproteobacteria;o__IS-44;f__
		k__Bacteria;p__Actinobacteria;c__Actinobacteria;o__Actinomycetales;f__Kineosporiaceae
		k__Bacteria;p__Proteobacteria;c__Alphaproteobacteria;o__Rhodospirillales;f__Acetobacteraceae
		k__Bacteria;p__Cyanobacteria;c__Oscillatoriophycideae;o__Oscillatoriales;f__Phormidiaceae
		k__Bacteria;p__Proteobacteria;c__Alphaproteobacteria;o__Rhizobiales;f__Beijerinckiaceae
		k__Bacteria;p__Actinobacteria;c__Actinobacteria;o__Actinomycetales;f__Pseudonocardiaceae
		k__Bacteria;p__Planctomycetes;c__Planctomycetia;o__Pirellulales;f__Pirellulaceae
		k__Bacteria;p__Fibrobacteres;c__Fibrobacteria;o__258ds10;f__
		k__Bacteria;p__Bacteroidetes;c__[Rhodothermi];o__[Rhodothermales];f__Rhodothermaceae
		k__Bacteria;p__Actinobacteria;c__Actinobacteria;o__Actinomycetales;__
		k__Bacteria;p__Actinobacteria;c__Actinobacteria;o__Actinomycetales;f__Intrasporangiaceae
		k__Bacteria;p__Actinobacteria;c__Actinobacteria;o__Actinomycetales;f__Gordoniaceae
cercaria-5	10	k__Bacteria;p__Planctomycetes;c__Planctomycetia;o__Planctomycetales;f__Planctomycetaceae
		k__Bacteria;p__Proteobacteria;c__Gammaproteobacteria;o__Oceanospirillales;f__Halomonadaceae
		k__Bacteria;p__Verrucomicrobia;c__Opitutae;o__[Cerasicoccales];f__[Cerasicoccaceae]
		k__Bacteria;p__Proteobacteria;c__Alphaproteobacteria;o__Rhodospirillales;f__
		k__Bacteria;p__Bacteroidetes;c__Flavobacteriia;o__Flavobacteriales;f__Cryomorphaceae
		k__Bacteria;p__Bacteroidetes;c__[Saprospirae];o__[Saprospirales];f__Saprospiraceae
		k__Bacteria;p__Armatimonadetes;c__Armatimonadia;o__Armatimonadales;f__Armatimonadaceae
		k__Bacteria;p__Proteobacteria;c__Betaproteobacteria;o__Rhodocyclales;f__Rhodocyclaceae
		k__Bacteria;p__Planctomycetes;c__Planctomycetia;o__Gemmatales;f__Isosphaeraceae
		k__Bacteria;p__Bacteroidetes;c__Sphingobacteriia;o__Sphingobacteriales;f__
metacercaria-5	12	k__Bacteria;p__Actinobacteria;c__Actinobacteria;o__Actinomycetales;f__Dermacoccaceae
		k__Bacteria;p__Proteobacteria;c__Alphaproteobacteria;o__Rhizobiales;f__Brucellaceae
		k__Bacteria;p__Proteobacteria;c__Betaproteobacteria;o__Methylophilales;f__Methylophilaceae
		k__Bacteria;p__Proteobacteria;c__Betaproteobacteria;o__Burkholderiales;f__Burkholderiaceae
		k__Bacteria;p__Proteobacteria;c__Alphaproteobacteria;o__Rickettsiales;f__
		k__Bacteria;p__Bacteroidetes;c__Bacteroidia;o__Bacteroidales;f__Porphyromonadaceae
		k__Bacteria;p__Firmicutes;c__Bacilli;o__Lactobacillales;f__
		k__Bacteria;p__Cyanobacteria;c__Nostocophycideae;o__Nostocales;f__Nostocaceae
		k__Bacteria;p__Proteobacteria;c__Alphaproteobacteria;o__Rhizobiales;f__Methylocystaceae
		k__Bacteria;p__Firmicutes;c__Bacilli;o__Lactobacillales;f__Aerococcaceae
		k__Bacteria;p__[Thermi];c__Deinococci;o__Deinococcales;f__Trueperaceae
		k__Bacteria;p__Actinobacteria;c__Actinobacteria;o__Actinomycetales;f__Actinomycetaceae
adult-5	22	k__Bacteria;p__Firmicutes;c__Clostridia;o__Clostridiales;f__Veillonellaceae
		k__Bacteria;p__Bacteroidetes;c__Bacteroidia;o__Bacteroidales;f__[Paraprevotellaceae]
		k__Bacteria;p__Verrucomicrobia;c__[Spartobacteria];o__[Chthoniobacterales];f__[Chthoniobacteraceae]
		k__Bacteria;p__Actinobacteria;c__Actinobacteria;o__Actinomycetales;f__Dermabacteraceae
		k__Bacteria;p__Firmicutes;c__Clostridia;__;__
		k__Bacteria;p__Actinobacteria;c__Coriobacteriia;o__Coriobacteriales;f__Coriobacteriaceae
		k__Bacteria;p__Cyanobacteria;c__4C0d-2;o__MLE1-12;f__
		k__Bacteria;p__Firmicutes;c__Erysipelotrichi;o__Erysipelotrichales;f__Erysipelotrichaceae
		k__Bacteria;p__Gemmatimonadetes;c__Gemm-5;o__;f__
		k__Bacteria;p__Proteobacteria;c__Gammaproteobacteria;o__Legionellales;f__Coxiellaceae
		k__Bacteria;p__Firmicutes;c__Bacilli;o__Gemellales;f__Gemellaceae
		k__Bacteria;p__Fusobacteria;c__Fusobacteriia;o__Fusobacteriales;f__Fusobacteriaceae
		k__Bacteria;p__Firmicutes;c__Clostridia;o__Clostridiales;f__Ruminococcaceae
		k__Bacteria;p__Spirochaetes;c__[Brevinematae];o__[Brevinematales];f__Brevinemataceae
		k__Bacteria;p__Proteobacteria;c__Gammaproteobacteria;o__Xanthomonadales;f__Sinobacteraceae
		k__Bacteria;p__Tenericutes;c__Mollicutes;o__Mycoplasmatales;f__Mycoplasmataceae
		k__Bacteria;p__Spirochaetes;c__Spirochaetes;o__Spirochaetales;f__Spirochaetaceae
		k__Bacteria;p__Spirochaetes;c__[Brachyspirae];o__[Brachyspirales];f__Brachyspiraceae
		k__Bacteria;p__Bacteroidetes;c__Bacteroidia;o__Bacteroidales;f__
		k__Bacteria;p__Elusimicrobia;c__Elusimicrobia;o__Elusimicrobiales;f__
		k__Bacteria;p__Actinobacteria;c__Actinobacteria;o__Actinomycetales;f__ACK-M1
		k__Bacteria;p__Bacteroidetes;__;__;__

## Sheet: Table S3
Table S3. Venn diagram intersection list of the family level taxa among the four life stages, host and environmental and external samples
Names	total	elements
adult-5 cercaria-5 environment-5 i-amphipod-5 i-fish-5 i-snail-5 mPBS-5 metacercaria-5 sporPBS-5 sporocyst-5	1	k__Bacteria;p__Proteobacteria;c__Gammaproteobacteria;o__Pseudomonadales;f__Moraxellaceae
aPBS-5 adult-5 cercaria-5 environment-5 i-amphipod-5 i-snail-5 mPBS-5 metacercaria-5 sporPBS-5 sporocyst-5	1	k__Bacteria;p__Proteobacteria;c__Betaproteobacteria;o__Burkholderiales;f__Oxalobacteraceae
adult-5 cercaria-5 environment-5 i-amphipod-5 i-snail-5 mPBS-5 metacercaria-5 sporPBS-5 sporocyst-5	2	k__Bacteria;p__Proteobacteria;c__Alphaproteobacteria;o__Caulobacterales;f__Caulobacteraceae
		k__Bacteria;p__Proteobacteria;c__Betaproteobacteria;o__Burkholderiales;f__Comamonadaceae
aPBS-5 adult-5 cercaria-5 environment-5 i-amphipod-5 i-snail-5 mPBS-5 metacercaria-5 sporocyst-5	1	k__Bacteria;p__Proteobacteria;c__Gammaproteobacteria;o__Xanthomonadales;f__Xanthomonadaceae
aPBS-5 adult-5 cercaria-5 environment-5 i-snail-5 mPBS-5 metacercaria-5 sporPBS-5 sporocyst-5	1	k__Bacteria;p__Actinobacteria;c__Actinobacteria;o__Actinomycetales;f__Corynebacteriaceae
adult-5 cercaria-5 i-amphipod-5 i-snail-5 mPBS-5 metacercaria-5 sporPBS-5 sporocyst-5	1	k__Bacteria;p__Firmicutes;c__Bacilli;o__Bacillales;f__Bacillaceae
aPBS-5 adult-5 cercaria-5 environment-5 i-amphipod-5 i-fish-5 i-snail-5 sporocyst-5	1	k__Bacteria;p__Bacteroidetes;c__[Saprospirae];o__[Saprospirales];f__Chitinophagaceae
adult-5 cercaria-5 environment-5 i-amphipod-5 i-snail-5 metacercaria-5 sporocyst-5	2	k__Bacteria;p__Bacteroidetes;c__Flavobacteriia;o__Flavobacteriales;f__Flavobacteriaceae
		k__Bacteria;p__Proteobacteria;c__Alphaproteobacteria;o__Sphingomonadales;f__Sphingomonadaceae
aPBS-5 adult-5 cercaria-5 i-snail-5 mPBS-5 metacercaria-5 sporocyst-5	1	k__Bacteria;p__Actinobacteria;c__Actinobacteria;o__Actinomycetales;f__Propionibacteriaceae
adult-5 environment-5 i-snail-5 mPBS-5 metacercaria-5 sporPBS-5 sporocyst-5	1	k__Bacteria;p__[Thermi];c__Deinococci;o__Thermales;f__Thermaceae
adult-5 environment-5 i-amphipod-5 i-fish-5 metacercaria-5 sporPBS-5 sporocyst-5	1	k__Bacteria;p__Actinobacteria;c__Actinobacteria;o__Actinomycetales;f__Micrococcaceae
aPBS-5 adult-5 environment-5 i-amphipod-5 mPBS-5 metacercaria-5 sporocyst-5	1	k__Bacteria;p__Proteobacteria;c__Betaproteobacteria;o__Neisseriales;f__Neisseriaceae
adult-5 environment-5 i-amphipod-5 i-fish-5 i-snail-5 mPBS-5 metacercaria-5	1	k__Bacteria;p__Proteobacteria;c__Gammaproteobacteria;o__Pasteurellales;f__Pasteurellaceae
cercaria-5 environment-5 i-amphipod-5 i-snail-5 metacercaria-5 sporocyst-5	1	k__Bacteria;p__Actinobacteria;c__Actinobacteria;o__Actinomycetales;f__Microbacteriaceae
cercaria-5 environment-5 i-amphipod-5 i-snail-5 mPBS-5 sporocyst-5	1	k__Bacteria;p__Proteobacteria;c__Deltaproteobacteria;o__Myxococcales;f__
adult-5 environment-5 i-amphipod-5 i-snail-5 metacercaria-5 sporocyst-5	2	k__Bacteria;p__Proteobacteria;c__Alphaproteobacteria;o__Rhodobacterales;f__Rhodobacteraceae
		k__Bacteria;p__Proteobacteria;c__Alphaproteobacteria;o__Rhizobiales;f__Bradyrhizobiaceae
aPBS-5 adult-5 i-snail-5 metacercaria-5 sporPBS-5 sporocyst-5	1	k__Bacteria;p__Proteobacteria;c__Alphaproteobacteria;o__Rhizobiales;f__Methylobacteriaceae
environment-5 i-amphipod-5 i-snail-5 metacercaria-5 sporPBS-5 sporocyst-5	1	k__Bacteria;p__Actinobacteria;c__Actinobacteria;o__Actinomycetales;f__Mycobacteriaceae
environment-5 i-fish-5 i-snail-5 mPBS-5 metacercaria-5 sporocyst-5	1	k__Bacteria;p__Firmicutes;c__Clostridia;o__Clostridiales;f__Clostridiaceae
adult-5 cercaria-5 environment-5 i-amphipod-5 i-snail-5 metacercaria-5	1	k__Bacteria;p__Proteobacteria;c__Gammaproteobacteria;o__Pseudomonadales;f__Pseudomonadaceae
adult-5 environment-5 i-amphipod-5 i-fish-5 mPBS-5 metacercaria-5	1	k__Bacteria;p__Bacteroidetes;c__Sphingobacteriia;o__Sphingobacteriales;f__Sphingobacteriaceae
cercaria-5 environment-5 i-amphipod-5 mPBS-5 sporocyst-5	1	k__Bacteria;p__Proteobacteria;c__Alphaproteobacteria;o__Rhizobiales;f__Phyllobacteriaceae
environment-5 i-amphipod-5 i-snail-5 metacercaria-5 sporocyst-5	3	k__Bacteria;p__Firmicutes;c__Clostridia;o__Clostridiales;f__Peptostreptococcaceae
		k__Bacteria;p__Bacteroidetes;c__Flavobacteriia;o__Flavobacteriales;f__[Weeksellaceae]
		k__Bacteria;p__Proteobacteria;c__Alphaproteobacteria;o__Rhizobiales;f__Hyphomicrobiaceae
environment-5 i-snail-5 mPBS-5 metacercaria-5 sporocyst-5	1	k__Bacteria;p__Actinobacteria;c__Actinobacteria;o__Actinomycetales;f__Geodermatophilaceae
adult-5 cercaria-5 environment-5 i-amphipod-5 metacercaria-5	1	k__Bacteria;p__Bacteroidetes;c__Cytophagia;o__Cytophagales;f__Cytophagaceae
adult-5 environment-5 i-amphipod-5 i-fish-5 i-snail-5	1	k__Bacteria;p__Tenericutes;c__Mollicutes;o__Mycoplasmatales;f__Mycoplasmataceae
adult-5 cercaria-5 metacercaria-5 sporocyst-5	1	k__Bacteria;p__Firmicutes;c__Bacilli;o__Lactobacillales;f__Streptococcaceae
cercaria-5 environment-5 i-amphipod-5 sporocyst-5	1	k__Bacteria;p__Verrucomicrobia;c__Verrucomicrobiae;o__Verrucomicrobiales;f__Verrucomicrobiaceae
adult-5 i-amphipod-5 metacercaria-5 sporocyst-5	1	k__Bacteria;p__Bacteroidetes;c__Bacteroidia;o__Bacteroidales;f__Prevotellaceae
adult-5 environment-5 i-amphipod-5 sporocyst-5	1	k__Bacteria;p__Proteobacteria;c__Alphaproteobacteria;o__Rhizobiales;f__Rhizobiaceae
environment-5 i-amphipod-5 i-fish-5 sporocyst-5	1	k__Bacteria;p__Proteobacteria;c__Alphaproteobacteria;o__Rhodospirillales;f__Acetobacteraceae
environment-5 i-amphipod-5 sporPBS-5 sporocyst-5	1	k__Bacteria;p__Proteobacteria;c__Gammaproteobacteria;o__Enterobacteriales;f__Enterobacteriaceae
cercaria-5 environment-5 i-amphipod-5 metacercaria-5	1	k__Bacteria;p__Actinobacteria;c__Acidimicrobiia;o__Acidimicrobiales;f__
adult-5 cercaria-5 environment-5 i-amphipod-5	1	k__Bacteria;p__Proteobacteria;c__Deltaproteobacteria;o__Bdellovibrionales;f__Bdellovibrionaceae
cercaria-5 environment-5 i-amphipod-5 i-snail-5	2	k__Bacteria;p__Proteobacteria;c__Betaproteobacteria;o__Rhodocyclales;f__Rhodocyclaceae
		k__Bacteria;p__Planctomycetes;c__Planctomycetia;o__Planctomycetales;f__Planctomycetaceae
adult-5 environment-5 i-snail-5 metacercaria-5	1	k__Bacteria;p__Firmicutes;c__Bacilli;o__Lactobacillales;__
environment-5 i-amphipod-5 i-snail-5 metacercaria-5	1	k__Bacteria;p__[Thermi];c__Deinococci;o__Deinococcales;f__Trueperaceae
environment-5 i-amphipod-5 i-fish-5 metacercaria-5	1	k__Bacteria;p__Proteobacteria;c__Alphaproteobacteria;o__Rickettsiales;f__
adult-5 environment-5 i-amphipod-5 i-snail-5	1	k__Bacteria;p__Proteobacteria;c__Gammaproteobacteria;o__Xanthomonadales;f__Sinobacteraceae
aPBS-5 environment-5 i-amphipod-5 i-snail-5	1	k__Bacteria;p__Proteobacteria;c__Alphaproteobacteria;o__Rhizobiales;f__
aPBS-5 environment-5 i-snail-5 sporPBS-5	1	k__Bacteria;p__Firmicutes;c__Bacilli;o__Bacillales;f__Paenibacillaceae
adult-5 environment-5 sporocyst-5	1	k__Bacteria;p__Cyanobacteria;c__Oscillatoriophycideae;o__Chroococcales;f__Xenococcaceae
environment-5 i-snail-5 sporocyst-5	1	k__Bacteria;p__Actinobacteria;c__Actinobacteria;o__Actinomycetales;f__Cellulomonadaceae
environment-5 i-amphipod-5 sporocyst-5	2	k__Bacteria;p__Planctomycetes;c__Planctomycetia;o__Pirellulales;f__Pirellulaceae
		k__Bacteria;p__Proteobacteria;c__Betaproteobacteria;o__Burkholderiales;f__Alcaligenaceae
cercaria-5 environment-5 i-amphipod-5	4	k__Bacteria;p__Bacteroidetes;c__Flavobacteriia;o__Flavobacteriales;f__Cryomorphaceae
		k__Bacteria;p__Bacteroidetes;c__[Saprospirae];o__[Saprospirales];f__Saprospiraceae
		k__Bacteria;p__Bacteroidetes;c__Sphingobacteriia;o__Sphingobacteriales;f__
		k__Bacteria;p__Armatimonadetes;c__Armatimonadia;o__Armatimonadales;f__Armatimonadaceae
cercaria-5 environment-5 i-fish-5	1	k__Bacteria;p__Proteobacteria;c__Gammaproteobacteria;o__Oceanospirillales;f__Halomonadaceae
environment-5 i-amphipod-5 metacercaria-5	1	k__Bacteria;p__Proteobacteria;c__Betaproteobacteria;o__Methylophilales;f__Methylophilaceae
aPBS-5 environment-5 metacercaria-5	1	k__Bacteria;p__Cyanobacteria;c__Nostocophycideae;o__Nostocales;f__Nostocaceae
adult-5 environment-5 i-snail-5	1	k__Bacteria;p__Firmicutes;c__Clostridia;o__Clostridiales;f__Ruminococcaceae
adult-5 environment-5 i-amphipod-5	3	k__Bacteria;p__Bacteroidetes;c__Bacteroidia;o__Bacteroidales;f__
		k__Bacteria;p__Bacteroidetes;__;__;__
		k__Bacteria;p__Actinobacteria;c__Actinobacteria;o__Actinomycetales;f__ACK-M1
aPBS-5 adult-5 i-fish-5	1	k__Bacteria;p__Spirochaetes;c__[Brevinematae];o__[Brevinematales];f__Brevinemataceae
environment-5 i-amphipod-5 i-snail-5	3	k__Bacteria;p__Proteobacteria;c__Alphaproteobacteria;__;__
		k__Bacteria;p__Actinobacteria;c__Actinobacteria;o__Actinomycetales;f__
		k__Bacteria;p__Proteobacteria;c__Gammaproteobacteria;o__Alteromonadales;f__[Chromatiaceae]
environment-5 i-fish-5 i-snail-5	1	k__Bacteria;p__Firmicutes;c__Clostridia;o__Clostridiales;f__Lachnospiraceae
environment-5 i-snail-5 sporPBS-5	2	k__Bacteria;p__Firmicutes;c__Bacilli;o__Bacillales;f__Planococcaceae
		k__Bacteria;p__Firmicutes;c__Bacilli;o__Bacillales;__
environment-5 i-amphipod-5 i-fish-5	2	k__Bacteria;p__Proteobacteria;c__Gammaproteobacteria;o__Aeromonadales;f__Aeromonadaceae
		k__Bacteria;p__Proteobacteria;c__Gammaproteobacteria;o__Alteromonadales;f__Shewanellaceae
environment-5 i-amphipod-5 mPBS-5	1	k__Bacteria;p__Proteobacteria;c__Alphaproteobacteria;o__Sphingomonadales;f__Erythrobacteraceae
adult-5 sporocyst-5	2	k__Bacteria;p__Firmicutes;c__Bacilli;o__Lactobacillales;f__Enterococcaceae
		k__Bacteria;p__Firmicutes;c__Bacilli;o__Bacillales;f__Staphylococcaceae
environment-5 sporocyst-5	8	k__Bacteria;p__Actinobacteria;c__Actinobacteria;o__Actinomycetales;f__Nocardioidaceae
		k__Bacteria;p__Actinobacteria;c__Actinobacteria;o__Actinomycetales;__
		k__Bacteria;p__Bacteroidetes;c__[Rhodothermi];o__[Rhodothermales];f__Rhodothermaceae
		k__Bacteria;p__Proteobacteria;c__Alphaproteobacteria;o__Rhizobiales;f__Beijerinckiaceae
		k__Bacteria;p__Actinobacteria;c__Actinobacteria;o__Actinomycetales;f__Pseudonocardiaceae
		k__Bacteria;p__Chloroflexi;c__Thermomicrobia;o__JG30-KF-CM45;f__
		k__Bacteria;p__Proteobacteria;c__Betaproteobacteria;o__IS-44;f__
		k__Bacteria;p__Cyanobacteria;c__Oscillatoriophycideae;o__Oscillatoriales;f__Phormidiaceae
i-amphipod-5 sporocyst-5	1	k__Bacteria;p__Proteobacteria;c__Epsilonproteobacteria;o__Campylobacterales;f__Campylobacteraceae
aPBS-5 sporocyst-5	1	k__Bacteria;p__Actinobacteria;c__Actinobacteria;o__Actinomycetales;f__Intrasporangiaceae
cercaria-5 environment-5	3	k__Bacteria;p__Planctomycetes;c__Planctomycetia;o__Gemmatales;f__Isosphaeraceae
		k__Bacteria;p__Verrucomicrobia;c__Opitutae;o__[Cerasicoccales];f__[Cerasicoccaceae]
		k__Bacteria;p__Proteobacteria;c__Alphaproteobacteria;o__Rhodospirillales;f__
environment-5 metacercaria-5	3	k__Bacteria;p__Bacteroidetes;c__Bacteroidia;o__Bacteroidales;f__Porphyromonadaceae
		k__Bacteria;p__Proteobacteria;c__Alphaproteobacteria;o__Rhizobiales;f__Methylocystaceae
		k__Bacteria;p__Proteobacteria;c__Betaproteobacteria;o__Burkholderiales;f__Burkholderiaceae
i-snail-5 metacercaria-5	1	k__Bacteria;p__Actinobacteria;c__Actinobacteria;o__Actinomycetales;f__Actinomycetaceae
adult-5 environment-5	5	k__Bacteria;p__Spirochaetes;c__Spirochaetes;o__Spirochaetales;f__Spirochaetaceae
		k__Bacteria;p__Elusimicrobia;c__Elusimicrobia;o__Elusimicrobiales;f__
		k__Bacteria;p__Verrucomicrobia;c__[Spartobacteria];o__[Chthoniobacterales];f__[Chthoniobacteraceae]
		k__Bacteria;p__Firmicutes;c__Erysipelotrichi;o__Erysipelotrichales;f__Erysipelotrichaceae
		k__Bacteria;p__Proteobacteria;c__Gammaproteobacteria;o__Legionellales;f__Coxiellaceae
adult-5 i-amphipod-5	1	k__Bacteria;p__Bacteroidetes;c__Bacteroidia;o__Bacteroidales;f__[Paraprevotellaceae]
adult-5 i-fish-5	2	k__Bacteria;p__Fusobacteria;c__Fusobacteriia;o__Fusobacteriales;f__Fusobacteriaceae
		k__Bacteria;p__Spirochaetes;c__[Brachyspirae];o__[Brachyspirales];f__Brachyspiraceae
adult-5 sporPBS-5	1	k__Bacteria;p__Firmicutes;c__Bacilli;o__Gemellales;f__Gemellaceae
environment-5 i-snail-5	1	k__Bacteria;p__Proteobacteria;c__Deltaproteobacteria;o__Desulfobacterales;f__Desulfobulbaceae
environment-5 i-amphipod-5	41	k__Bacteria;p__Proteobacteria;c__Betaproteobacteria;o__Burkholderiales;f__
		k__Bacteria;p__Proteobacteria;c__Gammaproteobacteria;__;__
		k__Bacteria;p__Verrucomicrobia;c__[Pedosphaerae];o__[Pedosphaerales];f__
		k__Bacteria;p__[Thermi];c__Deinococci;o__Deinococcales;f__Deinococcaceae
		k__Bacteria;p__Proteobacteria;c__Deltaproteobacteria;o__Myxococcales;f__Polyangiaceae
		k__Bacteria;p__Bacteroidetes;c__Flavobacteriia;o__Flavobacteriales;f__
		k__Bacteria;p__Proteobacteria;c__Gammaproteobacteria;o__Legionellales;f__Legionellaceae
		k__Bacteria;p__Proteobacteria;c__Alphaproteobacteria;o__BD7-3;f__
		k__Bacteria;p__Proteobacteria;c__Gammaproteobacteria;o__Alteromonadales;f__Alteromonadaceae
		k__Bacteria;p__Proteobacteria;c__Gammaproteobacteria;o__;f__
		k__Bacteria;p__Bacteroidetes;c__Cytophagia;o__Cytophagales;f__Cyclobacteriaceae
		k__Bacteria;p__Bacteroidetes;c__Cytophagia;o__Cytophagales;f__
		k__Bacteria;p__Proteobacteria;c__Deltaproteobacteria;o__;f__
		k__Bacteria;p__Proteobacteria;c__Deltaproteobacteria;o__Bdellovibrionales;f__Bacteriovoracaceae
		k__Bacteria;p__Proteobacteria;c__Alphaproteobacteria;o__Rhodobacterales;f__Hyphomonadaceae
		k__Bacteria;p__Firmicutes;c__Bacilli;o__Bacillales;f__[Exiguobacteraceae]
		k__Bacteria;p__TM6;c__SJA-4;o__;f__
		k__Bacteria;p__Planctomycetes;c__Planctomycetia;o__Gemmatales;f__Gemmataceae
		k__Bacteria;p__Proteobacteria;c__Alphaproteobacteria;o__Rhizobiales;__
		k__Bacteria;p__Proteobacteria;c__Alphaproteobacteria;o__Sphingomonadales;f__
		k__Bacteria;p__SR1;c__;o__;f__
		k__Bacteria;p__Proteobacteria;c__Deltaproteobacteria;o__Myxococcales;f__Nannocystaceae
		k__Bacteria;p__Cyanobacteria;c__ML635J-21;o__;f__
		k__Bacteria;p__Proteobacteria;c__Alphaproteobacteria;o__Rickettsiales;f__Pelagibacteraceae
		k__Bacteria;p__Planctomycetes;c__OM190;o__CL500-15;f__
		k__Bacteria;p__Planctomycetes;c__OM190;o__agg27;f__
		k__Bacteria;p__Actinobacteria;c__Thermoleophilia;o__Solirubrobacterales;__
		k__Bacteria;p__Proteobacteria;c__Deltaproteobacteria;o__Myxococcales;f__Haliangiaceae
		k__Bacteria;p__GN02;c__BD1-5;o__;f__
		k__Bacteria;p__Proteobacteria;c__Alphaproteobacteria;o__Sphingomonadales;__
		k__Bacteria;p__Proteobacteria;c__Betaproteobacteria;__;__
		k__Bacteria;p__Proteobacteria;c__Alphaproteobacteria;o__Rickettsiales;f__Rickettsiaceae
		k__Bacteria;p__Proteobacteria;c__Betaproteobacteria;o__MWH-UniP1;f__
		k__Bacteria;p__Armatimonadetes;c__[Fimbriimonadia];o__[Fimbriimonadales];f__[Fimbriimonadaceae]
		k__Bacteria;p__Firmicutes;c__Clostridia;o__Clostridiales;__
		k__Bacteria;p__Proteobacteria;c__Alphaproteobacteria;o__Rhizobiales;f__Xanthobacteraceae
		k__Bacteria;p__Proteobacteria;c__Alphaproteobacteria;o__Rhodospirillales;f__Rhodospirillaceae
		k__Bacteria;p__Proteobacteria;c__Gammaproteobacteria;o__Legionellales;f__
		k__Bacteria;p__Bacteroidetes;c__[Saprospirae];o__[Saprospirales];f__
		k__Bacteria;p__Proteobacteria;c__Deltaproteobacteria;o__Myxococcales;f__OM27
		k__Bacteria;p__Verrucomicrobia;c__[Pedosphaerae];o__[Pedosphaerales];f__R4-41B
environment-5 i-fish-5	1	k__Bacteria;p__Bacteroidetes;c__Bacteroidia;o__Bacteroidales;__
environment-5 sporPBS-5	1	k__Bacteria;p__Proteobacteria;c__Gammaproteobacteria;o__Alteromonadales;f__OM60
environment-5 mPBS-5	1	k__Bacteria;p__Actinobacteria;c__Thermoleophilia;o__Solirubrobacterales;f__
sporocyst-5	7	k__Bacteria;p__Actinobacteria;c__Actinobacteria;o__Actinomycetales;f__Gordoniaceae
		k__Bacteria;p__Gemmatimonadetes;c__Gemm-3;o__;f__
		k__Bacteria;p__Actinobacteria;c__Actinobacteria;o__Actinomycetales;f__Ruaniaceae
		k__Bacteria;p__Actinobacteria;c__Actinobacteria;o__Actinomycetales;f__Kineosporiaceae
		k__Bacteria;p__Actinobacteria;c__Thermoleophilia;o__Solirubrobacterales;f__Patulibacteraceae
		k__Bacteria;p__Actinobacteria;c__Actinobacteria;o__Actinomycetales;f__Brevibacteriaceae
		k__Bacteria;p__Fibrobacteres;c__Fibrobacteria;o__258ds10;f__
metacercaria-5	4	k__Bacteria;p__Firmicutes;c__Bacilli;o__Lactobacillales;f__Aerococcaceae
		k__Bacteria;p__Actinobacteria;c__Actinobacteria;o__Actinomycetales;f__Dermacoccaceae
		k__Bacteria;p__Proteobacteria;c__Alphaproteobacteria;o__Rhizobiales;f__Brucellaceae
		k__Bacteria;p__Firmicutes;c__Bacilli;o__Lactobacillales;f__
adult-5	6	k__Bacteria;p__Actinobacteria;c__Actinobacteria;o__Actinomycetales;f__Dermabacteraceae
		k__Bacteria;p__Actinobacteria;c__Coriobacteriia;o__Coriobacteriales;f__Coriobacteriaceae
		k__Bacteria;p__Firmicutes;c__Clostridia;o__Clostridiales;f__Veillonellaceae
		k__Bacteria;p__Firmicutes;c__Clostridia;__;__
		k__Bacteria;p__Cyanobacteria;c__4C0d-2;o__MLE1-12;f__
		k__Bacteria;p__Gemmatimonadetes;c__Gemm-5;o__;f__
environment-5	248	k__Bacteria;p__Planctomycetes;c__C6;o__MVS-107;f__
		k__Bacteria;p__Proteobacteria;c__Deltaproteobacteria;o__Syntrophobacterales;f__Syntrophaceae
		k__Bacteria;p__Proteobacteria;c__Gammaproteobacteria;o__Alteromonadales;f__125ds10
		k__Bacteria;p__Proteobacteria;c__Deltaproteobacteria;o__GMD14H09;f__
		k__Bacteria;p__OD1;c__Mb-NB09;o__;f__
		k__Bacteria;p__Fibrobacteres;c__;o__;f__
		k__Bacteria;p__Acidobacteria;c__Acidobacteria-6;o__BPC015;f__
		k__Bacteria;p__Actinobacteria;c__Actinobacteria;o__Actinomycetales;f__Streptomycetaceae
		k__Bacteria;p__Proteobacteria;c__Gammaproteobacteria;o__Methylococcales;f__Methylococcaceae
		k__Bacteria;p__Proteobacteria;c__Deltaproteobacteria;o__Desulfuromonadales;f__Geobacteraceae
		k__Bacteria;p__OD1;c__ABY1;o__;f__
		k__Bacteria;p__Bacteroidetes;c__Sphingobacteriia;o__Sphingobacteriales;f__NS11-12
		k__Bacteria;p__Proteobacteria;c__Betaproteobacteria;o__MND1;f__
		k__Bacteria;p__Cyanobacteria;c__;o__;f__
		k__Bacteria;p__Chlorobi;c__BSV26;o__VC38;f__
		k__Bacteria;p__Verrucomicrobia;c__Verruco-5;o__R76-B128;f__
		k__Bacteria;p__Chloroflexi;c__Anaerolineae;o__GCA004;f__
		k__Bacteria;p__Chlorobi;c__OPB56;o__;f__
		k__Bacteria;p__Proteobacteria;c__Gammaproteobacteria;o__HTCC2188;f__HTCC2089
		k__Bacteria;p__Cyanobacteria;c__Nostocophycideae;o__Stigonematales;f__Rivulariaceae
		k__Bacteria;p__Firmicutes;c__Clostridia;o__Clostridiales;f__Christensenellaceae
		k__Bacteria;p__Chlamydiae;c__Chlamydiia;o__Chlamydiales;f__
		k__Bacteria;p__Proteobacteria;c__Deltaproteobacteria;o__Syntrophobacterales;f__Syntrophobacteraceae
		k__Bacteria;p__Acidobacteria;c__Acidobacteria-6;o__CCU21;f__
		k__Bacteria;p__Firmicutes;c__Clostridia;o__Clostridiales;f__Peptococcaceae
		k__Bacteria;p__Proteobacteria;c__Betaproteobacteria;o__Burkholderiales;__
		k__Bacteria;p__Acidobacteria;c__Solibacteres;o__Solibacterales;f__[Bryobacteraceae]
		k__Bacteria;p__Proteobacteria;c__Gammaproteobacteria;o__Chromatiales;f__Chromatiaceae
		k__Bacteria;p__Proteobacteria;c__Gammaproteobacteria;o__Alteromonadales;f__211ds20
		k__Bacteria;p__Acidobacteria;c__iii1-8;o__32-20;f__
		k__Bacteria;p__Acidobacteria;c__RB25;o__;f__
		k__Bacteria;p__Proteobacteria;c__Deltaproteobacteria;__;__
		k__Bacteria;p__Proteobacteria;c__Betaproteobacteria;o__Thiobacterales;f__
		k__Bacteria;p__Firmicutes;c__Clostridia;o__Clostridiales;f__
		k__Bacteria;p__Acidobacteria;c__Holophagae;o__Holophagales;f__Holophagaceae
		k__Bacteria;p__Firmicutes;c__Clostridia;o__OPB54;f__
		k__Bacteria;p__Actinobacteria;c__Actinobacteria;o__;f__
		k__Bacteria;p__Gemmatimonadetes;c__Gemmatimonadetes;o__Gemmatimonadales;f__Gemmatimonadaceae
		k__Bacteria;p__TM6;c__F38;o__;f__
		k__Bacteria;p__Proteobacteria;c__Deltaproteobacteria;o__Desulfuromonadales;f__Desulfuromonadaceae
		k__Bacteria;p__Proteobacteria;c__TA18;o__CV90;f__
		k__Bacteria;p__Proteobacteria;c__Deltaproteobacteria;o__NB1-j;__
		k__Bacteria;p__Chlamydiae;c__Chlamydiia;o__Chlamydiales;f__Criblamydiaceae
		k__Bacteria;p__Actinobacteria;c__Acidimicrobiia;o__Acidimicrobiales;f__C111
		k__Bacteria;p__Actinobacteria;c__Acidimicrobiia;o__Acidimicrobiales;f__EB1017
		k__Bacteria;p__Chloroflexi;c__Anaerolineae;o__envOPS12;f__
		k__Bacteria;p__OP3;c__BD4-9;o__;f__
		k__Bacteria;p__Fibrobacteres;c__TG3;o__TG3-2;f__
		k__Bacteria;p__Planctomycetes;c__C6;o__d113;f__
		k__Bacteria;p__Gemmatimonadetes;c__Gemmatimonadetes;o__KD8-87;f__
		k__Bacteria;p__Actinobacteria;c__MB-A2-108;o__0319-7L14;f__
		k__Bacteria;p__Proteobacteria;c__Deltaproteobacteria;o__NB1-j;f__JTB38
		k__Bacteria;p__Bacteroidetes;c__Bacteroidia;o__Bacteroidales;f__Marinilabiaceae
		k__Bacteria;p__Verrucomicrobia;c__Opitutae;o__;f__
		k__Bacteria;p__Proteobacteria;c__Gammaproteobacteria;o__Alteromonadales;f__Psychromonadaceae
		k__Bacteria;p__Verrucomicrobia;c__Verruco-5;o__MSBL3;f__
		k__Bacteria;p__OD1;c__;o__;f__
		k__Bacteria;p__Fibrobacteres;c__TG3;o__TG3-1;f__
		k__Bacteria;p__WS3;c__PRR-12;o__Sediment-1;f__
		k__Bacteria;p__Planctomycetes;c__Planctomycetia;o__B97;f__
		k__Bacteria;p__Chlorobi;c__SJA-28;o__;f__
		k__Bacteria;p__NC10;c__12-24;o__JH-WHS47;f__
		k__Bacteria;p__Cyanobacteria;c__4C0d-2;o__SM2F09;f__
		k__Bacteria;p__Acidobacteria;c__AT-s54;o__;f__
		k__Bacteria;p__Proteobacteria;c__Gammaproteobacteria;o__Thiotrichales;f__Piscirickettsiaceae
		k__Bacteria;p__TM6;c__SBRH58;o__;f__
		k__Bacteria;p__Chloroflexi;c__Anaerolineae;o__S0208;f__
		k__Archaea;p__[Parvarchaeota];c__[Parvarchaea];o__YLA114;f__
		k__Bacteria;p__WS3;c__PRR-12;o__;f__
		k__Bacteria;p__Acidobacteria;c__;o__;f__
		k__Bacteria;p__Planctomycetes;c__Phycisphaerae;o__WD2101;f__
		k__Bacteria;p__Cyanobacteria;c__Synechococcophycideae;o__Synechococcales;f__Synechococcaceae
		k__Bacteria;p__Bacteroidetes;c__Cytophagia;o__Cytophagales;f__Flammeovirgaceae
		k__Bacteria;p__Bacteroidetes;c__Cytophagia;o__Cytophagales;__
		k__Bacteria;p__Acidobacteria;c__Acidobacteria-6;o__iii1-15;f__mb2424
		k__Bacteria;p__Proteobacteria;c__Deltaproteobacteria;o__Spirobacillales;f__
		k__Bacteria;p__Proteobacteria;c__Deltaproteobacteria;o__Myxococcales;f__Cystobacteraceae
		k__Bacteria;p__Chlamydiae;c__Chlamydiia;o__Chlamydiales;f__Rhabdochlamydiaceae
		k__Bacteria;p__Acidobacteria;c__EC1113;o__;f__
		k__Bacteria;p__Proteobacteria;c__Alphaproteobacteria;o__;f__
		k__Bacteria;p__Acidobacteria;c__TM1;o__;f__
		k__Bacteria;p__Proteobacteria;c__;o__;f__
		k__Bacteria;p__FBP;c__;o__;f__
		k__Bacteria;p__;c__;o__;f__
		k__Bacteria;p__Elusimicrobia;c__Elusimicrobia;o__FAC88;f__
		k__Bacteria;p__Proteobacteria;c__Deltaproteobacteria;o__PB19;f__
		k__Bacteria;p__FCPU426;c__;o__;f__
		k__Bacteria;p__Chlorobi;c__BSV26;o__A89;f__
		k__Bacteria;p__Acidobacteria;c__S035;o__;f__
		k__Bacteria;p__Fibrobacteres;c__TG3;o__;f__
		k__Bacteria;p__Proteobacteria;c__Gammaproteobacteria;o__Chromatiales;f__Ectothiorhodospiraceae
		k__Bacteria;p__Actinobacteria;c__Acidimicrobiia;o__Acidimicrobiales;f__JdFBGBact
		k__Bacteria;p__Spirochaetes;c__[Leptospirae];o__[Leptospirales];f__Leptospiraceae
		k__Bacteria;p__Planctomycetes;c__vadinHA49;o__DH61;f__
		k__Bacteria;p__Verrucomicrobia;c__Opitutae;o__Opitutales;f__Opitutaceae
		k__Bacteria;p__Acidobacteria;c__PAUC37f;o__;f__
		k__Bacteria;p__Cyanobacteria;c__Oscillatoriophycideae;o__Chroococcales;f__
		k__Bacteria;p__Proteobacteria;c__Alphaproteobacteria;o__Kiloniellales;f__
		k__Bacteria;p__Proteobacteria;c__Alphaproteobacteria;o__Ellin329;f__
		k__Archaea;p__[Parvarchaeota];c__[Parvarchaea];o__WCHD3-30;f__
		k__Bacteria;p__Acidobacteria;c__OS-K;o__;f__
		k__Bacteria;p__Proteobacteria;c__Deltaproteobacteria;o__Myxococcales;f__0319-6G20
		k__Bacteria;p__Gemmatimonadetes;c__Gemmatimonadetes;o__Gemmatimonadales;f__A1-B1
		k__Bacteria;p__Proteobacteria;c__Deltaproteobacteria;o__Syntrophobacterales;f__Syntrophorhabdaceae
		k__Bacteria;p__Chlamydiae;c__Chlamydiia;o__Chlamydiales;__
		k__Bacteria;p__Proteobacteria;c__TA18;o__PHOS-HD29;f__
		k__Bacteria;p__Bacteroidetes;c__Bacteroidia;o__Bacteroidales;f__SB-1
		k__Bacteria;p__Lentisphaerae;c__[Lentisphaeria];o__Z20;f__
		k__Bacteria;p__Verrucomicrobia;c__[Pedosphaerae];o__[Pedosphaerales];f__auto67_4W
		k__Bacteria;p__Chloroflexi;c__Anaerolineae;o__SJA-15;f__
		k__Bacteria;p__Chloroflexi;c__Anaerolineae;o__SBR1031;f__A4b
		k__Bacteria;p__Proteobacteria;c__Betaproteobacteria;o__;f__
		k__Bacteria;p__Proteobacteria;c__Deltaproteobacteria;o__BPC076;f__
		k__Bacteria;p__Nitrospirae;c__Nitrospira;o__Nitrospirales;f__0319-6A21
		k__Bacteria;p__Acidobacteria;c__[Chloracidobacteria];o__DS-100;f__
		k__Bacteria;p__Chlamydiae;c__Chlamydiia;o__Chlamydiales;f__Parachlamydiaceae
		k__Archaea;p__Euryarchaeota;c__Methanobacteria;o__Methanobacteriales;f__Methanobacteriaceae
		k__Bacteria;p__Proteobacteria;c__Gammaproteobacteria;o__Oceanospirillales;f__Alcanivoracaceae
		k__Bacteria;p__Proteobacteria;c__Alphaproteobacteria;o__Rickettsiales;__
		k__Bacteria;p__Actinobacteria;c__Thermoleophilia;o__Gaiellales;f__Gaiellaceae
		k__Bacteria;p__Firmicutes;c__Bacilli;o__Bacillales;f__Alicyclobacillaceae
		k__Bacteria;p__Chloroflexi;c__Anaerolineae;o__SHA-20;f__
		k__Bacteria;p__Actinobacteria;c__Acidimicrobiia;o__Acidimicrobiales;f__Iamiaceae
		k__Bacteria;p__Proteobacteria;c__Zetaproteobacteria;o__Mariprofundales;f__Mariprofundaceae
		k__Bacteria;p__Planctomycetes;c__vadinHA49;o__p04_C01;f__
		k__Bacteria;p__Chloroflexi;c__Anaerolineae;o__A31;f__S47
		k__Bacteria;p__WS3;c__PRR-12;o__LD1-PA13;f__
		k__Bacteria;p__Armatimonadetes;c__SHA-37;o__;f__
		k__Bacteria;p__Cyanobacteria;c__Synechococcophycideae;o__Pseudanabaenales;f__Pseudanabaenaceae
		k__Bacteria;p__Proteobacteria;c__Gammaproteobacteria;o__Legionellales;f__Francisellaceae
		k__Bacteria;p__Chloroflexi;c__Anaerolineae;__;__
		k__Bacteria;p__Acidobacteria;c__AT-s2-57;o__;f__
		k__Bacteria;p__Actinobacteria;c__Thermoleophilia;o__Gaiellales;f__AK1AB1_02E
		k__Bacteria;p__Chlorobi;c__BSV26;o__PK329;f__
		k__Bacteria;p__Chloroflexi;c__Anaerolineae;o__;f__
		k__Bacteria;p__Acidobacteria;c__Solibacteres;o__Solibacterales;f__
		k__Bacteria;p__Acidobacteria;c__Sva0725;o__Sva0725;f__
		k__Bacteria;p__Chloroflexi;c__TK10;o__;f__
		k__Bacteria;p__Bacteroidetes;c__BME43;o__;f__
		k__Bacteria;p__Proteobacteria;c__Deltaproteobacteria;o__Myxococcales;__
		k__Bacteria;p__Proteobacteria;c__Deltaproteobacteria;o__Sva0853;f__
		k__Bacteria;p__Proteobacteria;__;__;__
		k__Bacteria;p__Proteobacteria;c__Betaproteobacteria;o__SBla14;f__
		k__Bacteria;p__Cyanobacteria;c__Synechococcophycideae;o__Synechococcales;f__Chamaesiphonaceae
		k__Bacteria;p__Chloroflexi;c__Anaerolineae;o__Caldilineales;f__Caldilineaceae
		k__Bacteria;p__Acidobacteria;c__[Chloracidobacteria];o__PK29;f__
		k__Bacteria;p__Actinobacteria;c__Acidimicrobiia;o__Acidimicrobiales;__
		k__Bacteria;p__GN02;c__;o__;f__
		k__Bacteria;p__Proteobacteria;c__Deltaproteobacteria;o__Desulfobacterales;f__Desulfobacteraceae
		k__Bacteria;p__Proteobacteria;c__Deltaproteobacteria;o__Myxococcales;f__Myxococcaceae
		k__Bacteria;p__Lentisphaerae;c__[Lentisphaeria];o__Victivallales;f__Victivallaceae
		k__Archaea;p__Crenarchaeota;c__Thaumarchaeota;o__Cenarchaeales;f__Cenarchaeaceae
		k__Bacteria;p__Bacteroidetes;c__Bacteroidia;o__Bacteroidales;f__Bacteroidaceae
		k__Bacteria;p__Bacteroidetes;c__Bacteroidia;o__Bacteroidales;f__VC21_Bac22
		k__Bacteria;p__Chloroflexi;c__Anaerolineae;o__WCHB1-50;f__
		k__Bacteria;p__Elusimicrobia;c__Endomicrobia;o__;f__
		k__Bacteria;p__Verrucomicrobia;c__[Pedosphaerae];o__[Pedosphaerales];__
		k__Bacteria;p__Planctomycetes;c__Phycisphaerae;o__CCM11a;f__
		k__Bacteria;p__Fusobacteria;c__Fusobacteriia;o__Fusobacteriales;f__
		k__Bacteria;p__Verrucomicrobia;c__[Pedosphaerae];o__[Pedosphaerales];f__Ellin517
		k__Bacteria;p__Cyanobacteria;__;__;__
		k__Bacteria;p__Planctomycetes;c__;o__;f__
		k__Bacteria;p__TM6;c__;o__;f__
		k__Bacteria;p__OP3;c__koll11;o__;f__
		k__Bacteria;p__Actinobacteria;c__Acidimicrobiia;o__Acidimicrobiales;f__Microthrixaceae
		k__Bacteria;p__Proteobacteria;c__Deltaproteobacteria;o__Desulfarculales;f__Desulfarculaceae
		k__Bacteria;p__BHI80-139;c__;o__;f__
		k__Bacteria;p__Proteobacteria;c__Deltaproteobacteria;o__Desulfuromonadales;f__Pelobacteraceae
		k__Bacteria;p__Acidobacteria;c__DA052;o__Ellin6513;f__
		k__Bacteria;p__Chloroflexi;c__SL56;o__;f__
		k__Bacteria;p__Proteobacteria;c__Deltaproteobacteria;o__Myxococcales;f__Cystobacterineae
		k__Bacteria;p__Acidobacteria;c__[Chloracidobacteria];o__RB41;f__Ellin6075
		k__Bacteria;p__OD1;c__ZB2;o__;f__
		k__Bacteria;p__Verrucomicrobia;c__[Spartobacteria];o__[Chthoniobacterales];f__zEL20
		k__Bacteria;p__Verrucomicrobia;c__Verruco-5;o__;f__
		k__Bacteria;p__Gemmatimonadetes;c__Gemm-1;o__;f__
		k__Bacteria;p__Chloroflexi;c__Anaerolineae;o__H39;f__
		k__Bacteria;p__Cyanobacteria;c__Synechococcophycideae;o__Synechococcales;f__
		k__Bacteria;p__Proteobacteria;c__Deltaproteobacteria;o__NB1-j;f__MND4
		k__Bacteria;p__Proteobacteria;c__Gammaproteobacteria;o__[Marinicellales];f__[Marinicellaceae]
		k__Bacteria;p__Proteobacteria;c__Betaproteobacteria;o__Tremblayales;f__
		k__Bacteria;p__Actinobacteria;c__Thermoleophilia;o__Gaiellales;f__
		k__Bacteria;p__Nitrospirae;c__Nitrospira;o__Nitrospirales;f__FW
		k__Bacteria;p__Planctomycetes;c__Phycisphaerae;o__Phycisphaerales;f__
		k__Bacteria;p__Chloroflexi;c__Anaerolineae;o__Anaerolineales;f__Anaerolinaceae
		k__Bacteria;p__GN02;c__GKS2-174;o__;f__
		k__Bacteria;p__Proteobacteria;c__Deltaproteobacteria;o__NB1-j;f__
		k__Bacteria;p__Planctomycetes;c__Pla3;o__;f__
		k__Bacteria;p__Proteobacteria;c__Deltaproteobacteria;o__MBNT15;f__
		k__Bacteria;p__Cyanobacteria;c__Oscillatoriophycideae;o__Chroococcales;f__Cyanobacteriaceae
		k__Bacteria;p__Bacteroidetes;c__VC2_1_Bac22;o__;f__
		k__Bacteria;p__Acidobacteria;c__Acidobacteria-6;__;__
		k__Bacteria;p__Acidobacteria;c__Acidobacteria-6;o__iii1-15;f__
		k__Bacteria;p__OD1;__;__;__
		k__Bacteria;p__Chloroflexi;c__Chloroflexi;o__[Roseiflexales];f__
		k__Bacteria;p__Actinobacteria;c__Thermoleophilia;o__;f__
		k__Bacteria;p__Planctomycetes;c__vadinHA49;o__;f__
		k__Bacteria;p__KSB3;c__;o__;f__
		k__Bacteria;p__Proteobacteria;c__Alphaproteobacteria;o__Rhizobiales;f__Aurantimonadaceae
		k__Archaea;p__Crenarchaeota;c__MCG;o__pGrfC26;f__
		k__Bacteria;p__Actinobacteria;c__Actinobacteria;__;__
		k__Bacteria;p__WS3;c__PRR-12;o__Sediment-1;f__PRR-10
		k__Bacteria;p__Proteobacteria;c__Gammaproteobacteria;o__Chromatiales;__
		k__Bacteria;p__Cyanobacteria;c__Oscillatoriophycideae;o__Chroococcales;f__Gomphosphaeriaceae
		k__Bacteria;p__Proteobacteria;c__Betaproteobacteria;o__SC-I-84;f__
		k__Bacteria;p__Proteobacteria;c__Epsilonproteobacteria;o__Campylobacterales;f__Helicobacteraceae
		k__Bacteria;p__Proteobacteria;c__Gammaproteobacteria;o__Chromatiales;f__
		k__Bacteria;p__Fibrobacteres;c__Fibrobacteria;o__Ucp1540;f__
		k__Bacteria;p__Verrucomicrobia;c__[Methylacidiphilae];o__S-BQ2-57;f__
		k__Bacteria;p__Verrucomicrobia;c__Verruco-5;o__LD1-PB3;f__
		k__Bacteria;p__Verrucomicrobia;c__Verruco-5;o__WCHB1-41;f__RFP12
		k__Bacteria;p__Nitrospirae;c__Nitrospira;o__Nitrospirales;f__Nitrospiraceae
		k__Bacteria;p__Proteobacteria;c__Deltaproteobacteria;o__Desulfuromonadales;__
		k__Bacteria;p__TM7;c__TM7-1;o__;f__
		k__Bacteria;p__OP3;c__PBS-25;o__;f__
		k__Bacteria;p__Nitrospirae;c__Nitrospira;o__Nitrospirales;f__[Thermodesulfovibrionaceae]
		k__Bacteria;p__Acidobacteria;c__Solibacteres;o__Solibacterales;f__PAUC26f
		k__Bacteria;p__Proteobacteria;c__Deltaproteobacteria;o__FAC87;f__
		k__Bacteria;p__Proteobacteria;c__Gammaproteobacteria;o__Alteromonadales;f__HTCC2188
		k__Bacteria;p__Acidobacteria;c__Acidobacteria-6;o__iii1-15;f__RB40
		k__Bacteria;p__Chlorobi;c__;o__;f__
		k__Bacteria;p__Acidobacteria;c__[Chloracidobacteria];o__RB41;f__
		k__Bacteria;p__Chloroflexi;c__TK10;o__AKYG885;f__Dolo_23
		k__Bacteria;p__Verrucomicrobia;c__Verruco-5;o__WCHB1-41;f__
		k__Bacteria;p__Acidobacteria;c__BPC102;o__MVS-40;f__
		k__Bacteria;p__NKB19;c__;o__;f__
		k__Bacteria;p__Planctomycetes;c__Phycisphaerae;o__Phycisphaerales;f__Phycisphaeraceae
		k__Bacteria;p__Lentisphaerae;c__[Lentisphaeria];__;__
		k__Bacteria;p__Tenericutes;c__Mollicutes;o__;f__
		k__Bacteria;p__Cyanobacteria;c__Gloeobacterophycideae;o__Gloeobacterales;f__Gloeobacteraceae
		k__Bacteria;p__Proteobacteria;c__Betaproteobacteria;o__Ellin6067;f__
		k__Bacteria;p__BRC1;c__PRR-11;o__;f__
		k__Bacteria;p__Proteobacteria;c__Deltaproteobacteria;o__[Entotheonellales];f__
		k__Bacteria;p__Chlorobi;c__Ignavibacteria;o__Ignavibacteriales;f__Ignavibacteriaceae
		k__Bacteria;p__Verrucomicrobia;c__[Pedosphaerae];o__[Pedosphaerales];f__Ellin515
		k__Bacteria;p__Proteobacteria;c__Gammaproteobacteria;o__Methylococcales;f__Crenotrichaceae
		k__Bacteria;p__WS3;c__PRR-12;o__PBS-III-9;f__
		k__Bacteria;p__Proteobacteria;c__Deltaproteobacteria;o__MIZ46;f__
		k__Bacteria;p__Actinobacteria;c__OPB41;o__;f__
		k__Bacteria;p__Chloroflexi;c__Ellin6529;o__;f__
		k__Bacteria;p__Proteobacteria;c__Gammaproteobacteria;o__Oceanospirillales;f__Hahellaceae
		k__Bacteria;p__Gemmatimonadetes;c__Gemmatimonadetes;o__;f__
		k__Bacteria;p__Proteobacteria;c__Gammaproteobacteria;o__Thiotrichales;f__Thiotrichaceae
		k__Bacteria;p__Proteobacteria;c__Betaproteobacteria;o__Procabacteriales;f__Procabacteriaceae
		k__Bacteria;p__Acidobacteria;c__iii1-8;o__SJA-36;f__
		k__Bacteria;p__Proteobacteria;c__Gammaproteobacteria;o__Alteromonadales;f__
		k__Bacteria;p__Planctomycetes;c__Phycisphaerae;o__S-70;f__
		k__Bacteria;p__Planctomycetes;__;__;__
i-snail-5	4	k__Bacteria;p__Fusobacteria;c__Fusobacteriia;o__Fusobacteriales;f__Leptotrichiaceae
		k__Bacteria;p__Actinobacteria;c__Actinobacteria;o__Bifidobacteriales;f__Bifidobacteriaceae
		k__Bacteria;p__Proteobacteria;c__Betaproteobacteria;o__Nitrosomonadales;f__Nitrosomonadaceae
		k__Bacteria;p__Firmicutes;c__Clostridia;o__Clostridiales;f__[Tissierellaceae]
i-amphipod-5	4	k__Bacteria;p__Proteobacteria;c__Alphaproteobacteria;o__Rickettsiales;f__Holosporaceae
		k__Bacteria;p__Proteobacteria;c__Gammaproteobacteria;o__Cardiobacteriales;f__
		k__Bacteria;p__Tenericutes;c__Mollicutes;o__Acholeplasmatales;f__
		k__Bacteria;p__Proteobacteria;c__Betaproteobacteria;o__Procabacteriales;f__
i-fish-5	2	k__Bacteria;p__Firmicutes;c__Bacilli;o__Lactobacillales;f__Lactobacillaceae
		k__Bacteria;p__Proteobacteria;c__Alphaproteobacteria;o__Rickettsiales;f__Anaplasmataceae
mPBS-5	1	k__Bacteria;p__Actinobacteria;c__Actinobacteria;o__Actinomycetales;f__Nakamurellaceae

## Sheet: Table S4
Table S4. Kruskal-Wallis pairwise estimates for alpha diversity for the four life stages. Kruskal-Wallis (all groups) in all cases p > 0.05. BH-FDR, Benjamini & Hochberg (1995) correction for multiple testing.
		Faith-pd			Evenness			Shannon
Group 1	Group 2	H	p-value	BH-FDR	H	p-value	BH-FDR	H	p-value	BH-FDR
adult (n=9)	cercaria (n=5)	0.36	0.549	0.823	0.751	0.386	0.772	0.004	0.947	0.947
adult (n=9)	metacercaria (n=11)	2.668	0.102	0.307	0.175	0.676	0.83	0.244	0.621	0.932
adult (n=9)	sporocyst (n=5)	0.004	0.947	0.947	0.04	0.841	0.841	0.538	0.463	0.929
cercaria (n=5)	metacercaria (n=11)	0.927	0.336	0.671	2.339	0.126	0.379	0.029	0.865	0.947
cercaria (n=5)	sporocyst (n=5)	0.098	0.754	0.905	2.455	0.117	0.379	0.535	0.465	0.929
metacercaria (n=11)	sporocyst (n=5)	2.698	0.1	0.307	0.157	0.692	0.83	0.722	0.396	0.929
Reduced dataset
		Faith-pd			Evenness			Shannon
Group 1	Group 2	H	p-value	BH-FDR	H	p-value	BH-FDR	H	p-value	BH-FDR
adult (n=7)	cercaria (n=4)	0.142857	0.705457	0.868408	0.892857	0.344704	0.413645	0.321429	0.57075	1
adult (n=7)	metacercaria (n=8)	5.35714	0.0206376	0.123825	2.26339	0.132464	0.314598	0	1	1
adult (n=7)	sporocyst (n=3)	0.012987	0.909269	0.909269	0.012987	0.909269	0.909269	0.116883	0.73244	1
cercaria (n=4)	metacercaria (n=8)	2.33654	0.12637	0.37911	1.03846	0.30818	0.413645	0.259615	0.610385	1
cercaria (n=4)	sporocyst (n=3)	0.125	0.723674	0.868408	2	0.157299	0.314598	0.125	0.723674	1
metacercaria (n=8)	sporocyst (n=3)	1.04167	0.307434	0.614868	4.16667	0.0412268	0.247361	0.0416667	0.838256	1

## Sheet: Table S5
Table S5. Permutational ANOVA pairwise estimates for the four parasite life stages. BH-FDR, Benjamini & Hochberg (1995) correction for multiple testing.
			unweighted unifrac			weighted unifrac				Unweighted-unifrac-by Phylum			Unweighted-unifrac-by Family
Group 1	Group 2	Sample size	pseudo-F	p-value	BH-FDR	pseudo-F	p-value	BH-FDR		pseudo-F	p-value	BH-FDR	pseudo-F	p-value	BH-FDR
adult	cercaria	14	0.0895165	0.2173	0.32595	1.18044	0.271	0.3462		1.37472	0.2329	0.4658	1.16285	0.2462	0.3693		unweighted-unifrac	adonis	F = 1.1467, df = 3, p = 0.1617
adult	metacercaria	20	0.0661683	0.1382	0.2764	1.16493	0.2885	0.3462		1.76525	0.123	0.4658	1.32088	0.1471	0.2942			betadisper	F = 0.653, df = 3, p = 0.5788
adult	sporocyst	14	0.0597552	0.8656	0.8656	1.28946	0.1846	0.3462		0.649937	0.7314	0.7314	0.761529	0.8202	0.8202		weighted-unifrac	adonis	F = 1.2458, df = 3, p = 0.1337
cercaria	metacercaria	16	0.101362	0.0313	0.1878	1.48628	0.1075	0.3462		1.63856	0.1755	0.4658	1.67681	0.0309	0.1854			betadisper	F = 0.9532, df = 3, p = 0.4294
cercaria	sporocyst	10	0.138189	0.1219	0.2764	1.40605	0.1664	0.3462		1.04046	0.3662	0.5493	1.35675	0.0898	0.2694		unweighted-unifrac-phylum	adonis	F = 1.219, df = 3, p = 0.2643
metacercaria	sporocyst	16	0.0538271	0.7661	0.8656	1.02404	0.398	0.398		0.672809	0.6003	0.72036	0.819123	0.6947	0.8202			betadisper	F = 0.2083, df = 3, p = 0.8898
																	unweighted-unifrac-family	adonis	F = 1.1808, df = 3, p = 0.1535
																		betadisper	F = 0.769, df = 3, p = 0.5165
Reduced dataset
			unweighted unifrac			weighted unifrac				Unweighted-unifrac-by Phylum			Unweighted-unifrac-by Family
Group 1	Group 2	Sample size	pseudo-F	p-value	BH-FDR	pseudo-F	p-value	BH-FDR		pseudo-F	p-value	BH-FDR	pseudo-F	p-value	BH-FDR
adult	cercaria	11	0.920787	0.5781	0.5781	1.22323	0.2723	0.3316		1.32948	0.2413	0.4826	1.32948	0.2413	0.4826		unweighted-unifrac	adonis	F = 1.2513, df = 3, p = 0.123
adult	metacercaria	15	1.75069	0.0381	0.2286	1.68493	0.0936	0.2808		4.16316	0.0255	0.153	4.16316	0.0255	0.153			betadisper	F = 0.1011, df = 3, p = 0.96222
adult	sporocyst	10	1.12779	0.2858	0.4287	1.20331	0.3316	0.3316		0.841775	0.4871	0.73065	0.841775	0.4871	0.73065		weighted-unifrac	adonis	F = 1.3894, df = 3, p = 0.0847
cercaria	metacercaria	12	1.29024	0.1962	0.3924	1.25328	0.2661	0.3316		2.1767	0.1	0.3	2.1767	0.1	0.3			betadisper	F = 0.6902, df = 3, p = 0.581
cercaria	sporocyst	7	1.27875	0.142857	0.3924	1.70034	0.0857143	0.2808		0.290901	0.828571	0.828571	0.290901	0.828571	0.828571		unweighted-unifrac-phylum	adonis	F = 1.7182, df = 3, p = 0.1163
metacercaria	sporocyst	11	0.959791	0.4954	0.5781	1.26642	0.3182	0.3316		0.524116	0.6397	0.76764	0.524116	0.6397	0.76764			betadisper	F = 0.2291, df = 3, p = 0.8731
																	unweighted-unifrac-family	adonis	F = 1.2945, df = 3, p = 0.1146
																		betadisper	F = 0.0335, df = 3, p = 0.9927

## Sheet: Table S6
Table S6. Kruskal-Wallis pairwise estimates for alpha diversity for the four parasite life stages, respective host and environmental samples (76 pairwise comparisons not shown). BH-FDR refers to Benjamini & Hochberg (1995; “FDR”) correction for multiple testing. For all measures Kruskal-Wallis (all groups) p < 0.005
		Faith-pd			Evenness			Shannon
		H	p-value	BH-FDR	H	p-value	BH-FDR	H	p-value	BH-FDR
Host	Life Stage
snail (n=5)	sporocyst (n=5)	0.098	0.754	0.789	6.818	0.009	0.177	6.818	0.009	0.108
snail (n=5)	cercaria (n=5)	0.884	0.347	0.433	6.818	0.009	0.177	3.153	0.076	0.146
amphipod (n=6)	metacercaria (n=11)	11	0.001	0.067	4.889	0.027	0.177	11	0.001	0.083
fish (n=2)	adult (n=9)	0.5	0.48	0.539	3.556	0.059	0.177	4.5	0.034	0.127
Surface microbiota	Life Stage
sporPBS (n=2)	sporocyst (n=5)	1.35	0.245	0.314	3.75	0.053	0.177	3.75	0.053	0.127
mPBS (n=3)	metacercaria (n=11)	0.733	0.392	0.482	4.418	0.036	0.177	3.788	0.052	0.127
adPBS (n=2)	adult (n=9)	2	0.157	0.217	0.222	0.637	0.795	0.5	0.48	0.526
Environment	Life Stage
SLabEnv (n=2)	sporocyst (n=5)	3.75	0.053	0.146	3.75	0.053	0.177	3.75	0.053	0.127
environment (n=4)	sporocyst (n=5)	6	0.014	0.13	0.24	0.624	0.795	6	0.014	0.108
SLabEnv (n=2)	cercaria (n=5)	3.75	0.053	0.146	1.35	0.245	0.359	3.75	0.053	0.127
environment (n=4)	cercaria (n=5)	6	0.014	0.13	2.16	0.142	0.253	6	0.014	0.108
ALabEnv (n=2)	metacercaria (n=11)	4.714	0.03	0.146	1.909	0.167	0.282	4.714	0.03	0.127
environment (n=4)	metacercaria (n=11)	8.25	0.004	0.094	0.017	0.896	0.982	8.25	0.004	0.108
FlabEnv (n=2)	adult (n=9)	4.5	0.034	0.146	0.5	0.48	0.632	4.5	0.034	0.127
environment (n=4)	adult (n=9)	7.714	0.005	0.094	0.381	0.537	0.698	7.714	0.005	0.108
Reduced dataset (64 pairwise comparisons not shown). For all measures Kruskal-Wallis (all groups) p < 0.005
		Faith-pd			Evenness			Shannon
		H	p-value	BH-FDR	H	p-value	BH-FDR	H	p-value	BH-FDR
Host	Life Stage
snail (n=5)	sporocyst (n=3)	0.2	0.654721	0.729546	5	0.0253473	0.198578	0.555556	0.456057	0.530931
snail (n=5)	cercaria (n=4)	0.06	0.806496	0.838756	6	0.0143059	0.198578	1.5	0.220671	0.312952
amphipod (n=6)	metacercaria (n=8)	9.6	0.00194577	0.105292	3.26667	0.0707011	0.204248	9.6	0.00194577	0.105292
fish (n=2)	adult (n=7)	2.14286	0.143235	0.192626	4.2	0.040424	0.198578	3.08571	0.0789826	0.166529
Surface microbiota	Life Stage
sporPBS (n=2)	sporocyst (n=3)	0.333333	0.563703	0.637229	3	0.0832645	0.205742	0.333333	0.563703	0.618313
mPBS (n=2)	metacercaria (n=8)	0.0681818	0.794003	0.836922	4.36364	0.0367139	0.198578	1.09091	0.29627	0.391679
Environment	Life Stage
SLabEnv (n=2)	sporocyst (n=3)	3	0.0832645	0.162366	0.333333	0.563703	0.637229	3	0.0832645	0.166529
environment (n=4)	sporocyst (n=3)	4.5	0.0338949	0.135082	4.5	0.0338949	0.198578	4.5	0.0338949	0.142801
SLabEnv (n=2)	cercaria (n=4)	3.42857	0.0640775	0.135082	0.857143	0.354539	0.476794	3.42857	0.0640775	0.142801
environment (n=4)	cercaria (n=4)	5.33333	0.0209213	0.135082	0.333333	0.563703	0.637229	5.33333	0.0209213	0.142801
ALabEnv (n=2)	metacercaria (n=8)	4.36364	0.0367139	0.135082	2.45455	0.117185	0.205742	4.36364	0.0367139	0.142801
environment (n=4)	metacercaria (n=8)	7.38462	0.00657841	0.11717	1.03846	0.30818	0.437055	7.38462	0.00657841	0.11717
FlabEnv (n=2)	adult (n=7)	4.2	0.040424	0.135082	0.0857143	0.769698	0.822417	4.2	0.040424	0.142801
environment (n=4)	adult (n=7)	7	0.00815097	0.11717	1.28571	0.256839	0.37099	7	0.00815097	0.11717
spor: sporocyst; m: metacercaria; ad: adult; SLabEnv: water in which snails were kept in the lab; ALabEnv: water in which amphipods were kept in the lab; FLabEnv: water in which fish were kept in the lab.

## Sheet: Table S7
Table S7. Permutational ANOVA pairwise estimates for the four parasite life stages, respective host and environmental samples for the reduced dataset (76 pairwise comparisons not shown). BH-FDR, Benjamini & Hochberg (1995) correction for multiple testing.
			Unweighted-unifrac			Weighted-unifrac				Unweighted-unifrac-by Phylum			Unweighted-unifrac-by Family
		Sample size	pseudo-F	p-value	BH-FDR	pseudo-F	p-value	BH-FDR		pseudo-F	p-value	BH-FDR	pseudo-F	p-value	BH-FDR
Host	Life Stage																unweighted-unifrac	adonis	F = 3.1852, df = 12, p = 1e-04 ***
snail	sporocyst	8	1.6811	0.072	0.116308	5.28409	0.0185	0.0611625		0.292013	0.8202	0.8202	1.58487	0.1079	0.15106			betadisper	F = 4.2855, df = 12, p = 4e-04 ***
snail	cercaria	9	1.5309	0.063	0.11592	6.11939	0.0079	0.041475		0.671789	0.5823	0.69876	1.51451	0.119	0.161226
amphipod	metacercaria	14	7.88428	0.0005	0.0126	4.76951	0.0004	0.0168		11.0863	0.0005	0.021	9.35474	0.0007	0.0147		weighted-unifrac	adonis	F = 3.991, df = 12, p = 1e-04 ***
fish	adult	9	2.44971	0.025	0.0746667	2.00387	0.0258	0.0637412		2.6284	0.084	0.185684	2.4132	0.028	0.0683667			betadisper	F = 6.2682, df = 12, p = 1e-04 ***
Surface microbiota	Life Stage																unweighted-unifrac-phylum	adonis	F = 4.0028, df = 12, p = 0.001 ***
sporPBS	sporocyst	5	1.13146	0.4	0.435938	6.31507	0.1	0.144828		0.933379	0.4	0.525	1.08435	0.5	0.538462			betadisper	F = 0.9275 , df = 12, p = 0.504
mPBS	metacercaria	10	1.55002	0.1083	0.146729	3.86178	0.0207	0.0611625		1.21226	0.3795	0.525	1.72298	0.0907	0.144828
																	unweighted-unifrac-family	adonis	F = 3.4375, df = 12, p = 0.001 ***
Environment	Life Stage																	betadisper	F = 5.1845, df = 12, p = 0.001 ***
SLabEnv	sporocyst	5	3.21153	0.1	0.14	3.21411	0.1	0.144828		3.77541	0.1	0.190909	3.355	0.1	0.144828
environment	sporocyst	7	4.14406	0.0285714	0.0746667	5.86473	0.0285714	0.0654316		7.36811	0.0285714	0.0897	5.16089	0.0285714	0.0683667
SLabEnv	cercaria	6	2.70107	0.0666667	0.11592	0.93986	0.666667	0.666667		2.95064	0.0666667	0.155556	2.71831	0.0666667	0.116667
environment	cercaria	8	4.10048	0.0303	0.0746667	3.89158	0.0319	0.06699		6.84192	0.0299	0.0897	4.83795	0.0293	0.0683667
ALabEnv	metacercaria	10	3.99014	0.0247	0.0746667	2.47372	0.0226	0.0611625		6.79766	0.0243	0.0897	4.38658	0.0233	0.0683667
environment	metacercaria	12	7.05218	0.0018	0.0189	8.05136	0.0017	0.0231		16.4349	0.0024	0.0399	8.89424	0.0022	0.0231
FlabEnv	adult	9	4.06269	0.0267	0.0746667	1.64703	0.137	0.1644		5.51711	0.0275	0.0897	3.88223	0.0269	0.0683667
environment	adult	11	5.98824	0.0028	0.02352	3.88962	0.0033	0.0231		12.0331	0.0038	0.0399	7.00416	0.0028	0.02352
spor: sporocyst; m: metacercaria; ad: adult; SLabEnv: water in which snails were kept in the lab; ALabEnv: water in which amphipods were kept in the lab; FLabEnv: water in which fish were kept in the lab.

## Sheet: Table S8
Table S8. Quality assessment of mock communities - sequence evaluation results between observed and expected sequence reads. In red is hightlighted features classified as contaminats
	Query id	Subject id	Percent Identity	Alignment Length	Mismatches	Gaps	Alignment Start (query)	Alignment end (query)	Alignment Start (subject)	Alignment end (subject)	E Value	Bit Score	Query length	Percent Coverage
0	dc8a2f47b3d1dc2e1f5f805891976b29	Salmonella_enterica_16S_6	87.391	230	23	6	1	227	540	766	1.09E-071	259	227	1
1	a8e3edbdb73a64814dbe4ed1a0d54bb9	Bacillus_subtilis_16S_10	100	227	0	0	1	227	555	781	4.73E-120	420	227	1
2	d0342c301ce724bf1e8aa9803cce59f9	Escherichia_coli_16S_8	83.772	228	35	2	1	227	547	773	2.39E-058	215	227	1
3	8bc89318553cfb41a67a59ed4b7a9470	Listeria_monocytogenes_16S_6	100	227	0	0	1	227	555	781	4.73E-120	420	227	1
4	c2d41dc0a7b8eaedcf4697512aee4427	Staphylococcus_aureus_16S_6	100	227	0	0	1	227	555	781	4.73E-120	420	227	1
5	c33507209d9aff8135ca7367f77a152f	Lactobacillus_fermentum_16S_5	100	227	0	0	1	227	573	799	4.73E-120	420	227	1
6	6bd1aed189655ce4c06d04e707bcbbb0	Salmonella_enterica_16S_6	100	227	0	0	1	227	540	766	4.73E-120	420	227	1
7	17f016e3298748a0eb03b67eb9267a19	Escherichia_coli_16S_8	100	227	0	0	1	227	547	773	4.73E-120	420	227	1
8	d808fb59707b01e9c7c0c24f792b8654	Pseudomonas_aeruginosa_16S_4	100	227	0	0	1	227	532	758	4.73E-120	420	227	1
9	13e52764e1c08c4fd9902769bf9e022e	Enterococcus_faecalis_16S_4	100	227	0	0	1	227	563	789	4.73E-120	420	227	1
10	4ba88bab125524fad15a6d4b63af9480	Salmonella_enterica_16S_1	100	227	0	0	1	227	540	766	4.73E-120	420	227	1
11	9ef4030e295a6ab248057e5a7425d9a4	Salmonella_enterica_16S_6	91.189	227	20	0	1	227	540	766	1.07E-086	309	227	1
